1           **Structural basis for the neurotropic AAV9 and the**  
2           **engineered AAVPHP.eB recognition with cellular**  
3           **receptors**

4

5           Guangxue Xu<sup>1,§</sup>, Ran Zhang<sup>2,§</sup>, Huapeng Li<sup>3</sup>, Kaixin Yin<sup>4</sup>, Xinyi Ma<sup>5</sup> and Zhiyong  
6           Lou<sup>1,\*</sup>

7

8           <sup>1</sup> MOE Key Laboratory of Protein Science & Collaborative Innovation Center of  
9           Biotherapy, School of Medicine, Tsinghua University, Beijing, China

10          <sup>2</sup> School of Life Sciences, Tsinghua University, Beijing, China

11          <sup>3</sup> PackGene Biotech, Guangzhou, Guangdong, China

12          <sup>4</sup> International School of Beijing, Beijing, China

13          <sup>5</sup> Beijing No.8 High School, Beijing, China

14          <sup>§</sup> These authors contribute equally to this work

15          \* Correspondence should be addressed to: G.X. (xgx16@tsinghua.org.cn) and Z.L.

16          (louzy@mail.tsinghua.edu.cn)

17

18          **Keywords:** AAV9, AAVPHP.eB, AAVR, cryo-EM

19

20

21

## 22        **Abstract**

23        Clade F adeno-associated virus (AAV) 9 has been utilized as therapeutic  
24        gene delivery vector, and it is capable of crossing blood brain barrier (BBB).  
25        Recently, an AAV9 based engineering serotype with enhanced BBB crossing  
26        ability, AAVPHP.eB, further expand clade F AAVs' usages in the central nervous  
27        system (CNS) gene delivery. In this study, we determined the cryo-electron  
28        microscopy (cryo-EM) structures of the AAVPHP.eB, and its parental serotype  
29        AAV9 alone or in complex with their essential receptor Adeno-associated virus  
30        receptor (AAVR). These structures reveal the molecular details of their AAVR  
31        recognition, where the polycystic kidney disease (PKD) repeat domain 2 (PKD2)  
32        of AAVR interact to the 3-fold protrusions and the raised capsid regions  
33        between the 2- and 5-fold axes termed the 2/5-fold wall of both AAV9 and AAV-  
34        PHP.eB virions. The interacting patterns of AAVR to AAV9 and AAVPHP.eB are  
35        similar with what was observed in AAV1/AAV2-AAVR complexes. Moreover, we  
36        found that AAVPHP.eB variable region VIII (VR-VIII) may independently  
37        facilitate the new receptor recognition responsible for enhanced CNS  
38        transduction. Our study provides insights into different receptor recognition for  
39        engineered AAVPHP.eB and parental serotype AAV9, and further reveal the  
40        potential molecular basis underlying their different tropism.

41

## 42        **Introduction**

43        Gene therapy offers a promising therapeutic approach for genetic disorders.  
44        With the rapid development of gene delivery vectors, deliver methods play a  
45        crucial role in gene therapy. Among various gene therapies deliver vectors,  
46        Adeno-associated viruses (AAVs) fulfill the criteria for being highly efficient and  
47        non-pathogenic as a viral vector in human body. To date, there have been  
48        several FDA approved AAV based gene therapy, and numerous ongoing clinical  
49        trials<sup>1-3</sup>.

50        Naturally occurring serotypes of AAVs have been demonstrated to have  
51        varied tropism and transduction efficiencies in tissues<sup>4</sup>, however, therapeutic  
52        delivery through the blood brain barrier (BBB) remains a challenge for the  
53        application of gene therapy in neurological disorder<sup>5</sup>. Several in vivo selected  
54        AAV capsids derived from AAV9, such as AAVPHP.eB and AAVPHP.V1 shows  
55        enhanced BBB penetrating ability via intravenous administration<sup>6-8</sup>. These  
56        variants have paved the way for precise and non-invasive gene therapy delivery.  
57        Adeno-associated virus receptor (AAVR) is a transmembrane glycosylated  
58        protein containing five polycystic kidney disease (PKD) extracellular domains<sup>9</sup>.  
59        AAVR is reported to likely play a role in AAV tropism, and where AAVs adopt  
60        distinct interaction pattern to different PKD domains of AAVR<sup>10,11</sup>. With the  
61        assistance of bioinformatic approaches, recent studies have identified a

62 glycosylphosphatidylinositol (GPI) -anchored protein expressed on brain  
63 endothelial cells called lymphocyte antigen 6 complex, locus A (LY6A, also  
64 known as stem cell antigen-1 [SCA-1]) LY6A to be the cellular receptor  
65 responsible for the enhanced movement across BBB<sup>12,13</sup>.

66 In this work, we report the cryo-EM structure of engineered AAVPHP.eB  
67 and its parental serotype AAV9 as well as their complexes with the universal  
68 AAV receptor AAVR. We also explore the interaction between AAVPHP.eB and  
69 recently identified receptor LY6A. The structures of AAV with its receptors  
70 inform that the 7- amino-acid (TLAVPFK) insertion in AAV capsid variable region  
71 VIII (VR-VIII) facilitates AAVPHP.eB with different receptor binding ability  
72 independent of conventional AAVR. The receptor interacting residues of  
73 engineered AAVPHP.eB also reveal underlying molecular mechanism of its  
74 enhanced BBB penetration and CNS transduction.

75

## 76 **Results**

### 77 **Overall structure of AAV9, AAV-PHP.eB in their native form and AAVR** 78 **bounded form**

79 We first solved the structure of native AAV9 and AAV-PHP.eB by cryo-  
80 electron microscopy at the resolution of 3.87 Å and 2.85 Å at a 0.143 cutoff of  
81 FSC (**Supplementary Table 1, Supplementary Figure 1**). AAV9 and AAV-

82 PHP.eB share common structural features with reported AAV9 crystal structure  
83 and other structures of AAV serotypes, including protrusions surrounding the 3-  
84 fold axes, a channel-like structure at 5-fold axes and depressions at the  
85 icosahedral 2-fold axes. A 2/5-fold wall is located between the depression at the  
86 2-fold axis and the 5-fold channel. **(Figure 1a, b)**. More pronounced protrusions  
87 around 3-fold axis were observed in AAVPHP.eB capsid compared to those in  
88 AAV9 capsid **(Figure 1b)**.

89 Next, AAV9 and AAVPHP.eB were individually incubated with the soluble  
90 AAVR extracellular fragment containing PKD1-5 and structures of the AAV9-  
91 AAVR and AAVPHP.eB-AAVR complexes were subsequently determined by  
92 cryo-EM. The final resolutions of the cryo-EM reconstruction were estimated to  
93 be 3.23 Å for the AAV9-AAVR complex and 3.76 Å for the AAVPHP.eB-AAVR  
94 complex at a 0.143 cutoff of FSC **(Supplementary Table 1, Supplementary**  
95 **Figure 1)**. The resolution of additional attached density sitting above AAV9 and  
96 AAVPHP.eB capsid in AAVR complex reconstructions were sufficient to  
97 identified as AAVR PKD2 **(Supplementary Figure 2)**. Interaction pattern of  
98 AAVR PKD2 with AAV9 or AAVPHP.eB capsid is similar to that with AAV1 and  
99 AAV2<sup>11,14</sup>.

100

### 101 **AAV9 and AAVPHP.eB receptor binding interfaces**

102 Resembling the engagement pattern of AAVR with AAV1 and AAV2, one

103 PKD2 molecule also interacts with two capsid proteins of AAV9 or AAVPHP.eB.  
104 A total of 19 AAVR residues are within 4 Å distance of the AAV9 capsid and a  
105 total of 12 AAVR residues are within 4 Å distance of the AAVPHP.eB capsid  
106 **(Supplementary Table 2)**. Most AAV9 capsid interacting residues of PKD2  
107 reside in A-B loop and B-C loop, three residues (R406, S413 and F416) in N-  
108 terminal of PKD2, two residues (I462 and K464) in D strand, and one additional  
109 residue (Y442) in C strand. While most AAVPHP.eB capsid interacting residues  
110 of PKD2 reside in the B-C loop, one residue (E418) in strand A, one residue  
111 (S425) in A-B loop and one residue (Y442) in C strand. Hydrogen-bond  
112 interacting residues prediction by LigPlot+ reveals that AAVR R406, S431,  
113 D435, D437 and I439 potentially form hydrogen bonds with AAV9 capsid, and  
114 a potential salt bridge between positively charged AAVR K438 and negatively  
115 charged AAV9 D384 **(Supplementary Table 2, Figure 2a)**. Only four residues  
116 in AAVR PKD2 (S431, D435, D436, and D437) potentially form hydrogen bonds  
117 with the AAVPHP.eB capsid **(Figure 2b)**. Surface plasmon resonance  
118 measurements indicate that AAV9 binds with AAVR at a KD of 138.5 nM in vitro,  
119 whereas KD of AAVPHP.eB is evaluated at 273.8nM **(Supplementary Figure**  
120 **5)**. We reasoned that narrow interface, fewer hydrogen bonds and lack of salt  
121 bridge between AAVPHP.eB and AAVR PKD2 may provide molecular  
122 explanation for the lower affinity of AAVPHP.eB to AAVR.

123

124        **Capsid structure of AAV9 and AAVPHP.eB upon AAVR binding**

125        Consistent with previously reported AAV structures, only viral protein 3  
126 (VP3) common region density can be defined in AAV9 and AAVPHP.eB  
127 reconstruction maps. For AAV9, amino acid density from D219 to L736 was  
128 observable, and for AAVPHP.eB amino acid density from D219 to L743 was  
129 observable. In AAV9, there were 12 capsomer A residues and 4 capsomer B  
130 residues within 4 Å distance of AAVR PKD2. In AAVPHP.eB, 10 capsomer A  
131 residues and 3 capsomer B residues were within 4 Å distance of AAVR PKD2  
132 **(Supplementary Table 2)**. All capsid residues close to AAVR PKD2 in both  
133 AAV9 and AAVPHP.eB reside in VR-I, VR-III, VR-IV, VR-V and VR-VIII.

134        The side-chain density of VR-VIII in AAV9 prior and post AAVR binding can  
135 be well defined at SD level of 1.5 **(Figure 3a, b)**. While AAVPHP.eB possessed  
136 an engineered VR-VIII with an insertion of seven peptides (TLAVPFK) between  
137 the residue 588 and 589 and 2 mutations (A587D, Q588G AAVPHP.eB  
138 numbering)<sup>7</sup>. The 7-amino-acid insertion pointed further out from the capsid and  
139 does not alter the conformation of the ascending arm before S586 and  
140 descending arm after A596. The density of residues reside at the base of native  
141 AAVPHP.eB VR-VIII insertion was evident at SD level of 0.65, but L590 and  
142 A591 which reside on the top of the engineered loop remain lack of density  
143 under same SD level **(Figure 3c)**. Upon AAVR binding, the main-chain density  
144 of L590 and A591 was revealed at SD level of 0.65 and the VR-VIII density can

145 be better defined (**Figure 3d**). The density of other AAVR PKD2 interacting VRs  
146 (VR-I, VR-III, VR-IV and VR-V) in AAV9 and AAVPHP.eB native or AAVR bound  
147 state can be well defined at SD level of 1.

148 Both AAV9 and AAVPHP.eB capsid protein show negligible overall  
149 conformational change upon AAVR binding. The capsid structures of native  
150 AAV9 and AAV9 complexed with AAVR shared a RMSD of 0.480 across all C $\alpha$   
151 atoms in 518 residues. And the capsid structures of AAVPHP.eB and  
152 AAVPHP.eB complexed with AAVR differed by a RMSD of 0.515 across all C $\alpha$   
153 atoms in 527 residues.

154 However, the difference at VR-I was much significant with a C $\alpha$  RMSD of  
155  $\sim 1.158$  Å in AAV9 and  $\sim 1.152$  Å in AAVPHP.eB. S268 main chain flipped away  
156 from AAVR and C $\alpha$  moved away from receptor by  $\sim 2.95$  Å in AAV9 and  $\sim 2.03$   
157 Å in AAVPHP.eB respectively upon AAVR binding (**Figure 4 a, c**). In the  
158 previous study, S268 in AAVrh.10 was proposed to be key a residue in BBB  
159 penetration<sup>15,16</sup>. Interestingly, S268 is also conserve in AAV9 and AAVPHP.eB  
160 sequence. The repulsion of S268 in AAV9/AAVPHP.eB upon AAVR binding and  
161 the sequence conversation of this residue among different BBB penetrating  
162 AAVs hint its special role in AAVR binding and the potential relationship  
163 between the AAVR recognizing and BBB penetrating of AAV9.

164 The AAV9 VR-VIII (C $\alpha$  RMSD  $\sim 0.76$  Å) underwent less significant  
165 conformational change compared to AAVPHP.eB (C $\alpha$  RMSD  $\sim 1.476$  Å) AAVR



166 binding. AAV9 Q585 was pushed away from AAVR by  $\sim 1.62$  Å, while other  
167 residues in AAV9 VR-VIII showed no significant position shift (**Figure 4 b**). For  
168 AAVPHP.eB VR-VIII, P593 was pushed away from AAVR by  $\sim 1.53$  Å and the  
169 apex for VR-VIII loop was lifted after AAVR interaction (**Figure 4 d**).

170 Collectively, these results suggest that the BBB penetrating associated  
171 residue S268 in VR-I may play special role in AAVR interaction, thus further  
172 indicate the potential relationship between AAVR and various tissue tropism.

173

#### 174 **Diverse VR conformation in various AAV serotypes**

175 To characterize similarities and differences between AAVR PKD2  
176 interacting and BBB penetrating AAVs, we superposed AAV1, AAV2, AAV9,  
177 AAVPHP.eB and AAVrh.10 capsid structures. Superposition suggested that  
178 most structural variability occurred in VR-I, VR-II, VR-IV and VR-VIII.

179 AAVR PKD2 interacting VR-I and VR-IV showed most structural diversity  
180 among serotypes. Comparing with AAV2 VR-I, AAV1 and AAV9/PHP.eB VR-I  
181 exhibited more extended loop toward virus surface due to a single amino acid  
182 insertion in AAV1 VR-I and a 2-amino-acid insertion in AAV9/PHP.eB. Despite  
183 high sequence conservation among AAVrh.10 and AAV9/PHP.eB VR-I,  
184 AAVrh.10 VR-I exhibited a different conformation, which pointed outwards from  
185 the virus surface.

186 Among AAVR PKD2 interacting AAVs, only AAV9/PHP.eB have potential

187 VR-IV interaction with AAVR. AAV9/PHP.eB VR-IV is closer to adjacent AAVR  
188 compared to that of AAV1. AAV2 VR-IV adopts a perpendicular position and  
189 more extended conformation compared to that of AAV1 and AAV9/PHP.eB.  
190 AAVrh.10 VR-IV has a similar loop conformation with that of AAV1.

191 VR-IIs located around 5-fold axis also exhibit structural discrepancy among  
192 serotypes. To note, although VR-II amino acids were identical in AAV9 and  
193 AAVPHP.eB, loops showed different conformation.

194 Despite the 7-amino-acid insertion and 2 mutation in VR-VIII of AAVPHP.eB,  
195 VR-VIII among different AAV serotypes shared common morphology.

196

### 197 **Relationship between AAV9 receptors and neutralizing antibody**

198 Previous studies have identified galactose as primary attachment receptor  
199 for AAV9 and mapped N470, D271, N272, Y446, and W503 as the binding  
200 pocket at the region in between 3-fold protrusion and 2/5-fold wall<sup>17,18</sup>. While  
201 the AAVR PKD2 footprint bridges the 3-fold protrusion and 2/5-fold wall on  
202 AAV9 capsid. The AAVR PKD2 footprint and galactose binding pocket only  
203 share one common residue W503, indicating galactose and AAVR may serve  
204 as independent receptor for AAV9 attachment and transduction.

205 To date, two antibody-AAV9 complex structures have been reported,  
206 including a BALB/c mouse originated and hybridoma-screening based antibody  
207 PAV9.1 and a commercially available nanobody CSAL9, both of which exhibit

208 neutralizing activity against AAV9<sup>19,20</sup>. The epitope of PAV9.1 lays on the 3-fold  
209 axis of AAV9 overlapping with AAVR footprint by two residues (Q588 and Q590)  
210 **(Figure 5c)**. Another study powered by M13 phage display technology  
211 characterized potential immunogenic AAV9 VP3 epitopes largely overlap with  
212 the AAVR footprint regions on 3-fold protrusion and 2/5-fold wall<sup>21</sup>.

213 Interestingly, both AAVR PKD2 footprint and epitopes screened from phage  
214 display technology only overlap with galactose binding pocket by 1 residue  
215 (W503) on AAV9 capsid. Again, indicating W503 may serve as important dual  
216 functional residue in both galactose mediated viral attachment and AAVR  
217 mediated transduction. This is also in consistent with the finding in previous  
218 mutagenesis study which suggested a dual role of residues from E500 to W503  
219 facilitating successful transduction other than galactose attachment<sup>22</sup>.

220 To note, CSAL9 binding to AAV9 also occludes residues around 5-fold axis  
221 and phage display screened epitopes also elicited antigenic VP1/2 N terminal  
222 residues<sup>20,21</sup>, suggesting that other than AAVR, VP1/2 common N terminal  
223 region may also serve as crucial part in AAV transduction process.

224

## 225 **LY6A binding to AAVPHP.eB**

226 Recent studies have reported that the enhanced CNS transduction and  
227 BBB penetration of AAVPHP.eB is driven by a GPI-anchored protein, LY6A,  
228 independent of AAVR. Then we purified extracellular domain of LY6A in 293F

229 cells to further investigate their interaction. SPR sensorgrams reveal a small-  
230 molecule-like fast association and disassociation of LY6A to AAVPHP.eB  
231 **(Supplementary Figure 8b)**. Whereas injecting LY6A onto the AAV9  
232 immobilized CM5 sensor chip, no SPR signals were detected **(Supplementary**  
233 **Figure 8a)**. Due to the dynamic interaction of LY6A to AAVPHP.eB, we  
234 incubated LY6A and AAVPHP.eB in the absence of AAVR with glutaraldehyde  
235 at a final concentration of 0.05% immediately before applying to cryo sample  
236 grids. Then the preliminary structure of AAVPHP.eB-LY6A is characterized by  
237 cryo-EM at 200kV. An additional vague density is observed on the top of  
238 AAVPHP.eB 3-fold axis and did not occupy the binding position of AAVR PKD2  
239 **(Supplementary Figure 8c)**. To further validate LY6A binding site on  
240 AAVPHP.eB, a SPR competition assay was performed. Analysis of the resultant  
241 sensorgrams showed that the binding of AAVR had no impact on subsequent  
242 LY6A binding and vice versa **(Supplementary Figure 9)**. Additionally, this  
243 density extended from the middle of the 3-fold axis to interact with 3-fold  
244 protrusion formed by VR-VIII **(Supplementary Figure 8d and e)**. These  
245 observations further demonstrate that the enhanced CNS transduction and  
246 BBB penetration of AAVPHP.eB is driven by the alternative receptor LY6A  
247 independent of AAVR.  
248

## 249        **Discussion**

250        In this study, we report the native AAV9 and AAVPHP.eB and their complex  
251        structures with cellular receptor AAVR. The structures of AAV9-AAVR and  
252        AAVPHP.eB-AAVR demonstrate that AAVR PKD2 binds to AAV9/PHP.eB  
253        between 3-fold protrusion and 2/5-fold wall, which share a similar AAVR  
254        interaction pattern with that of AAV1 and AAV2.

255        VR-I, VR-III, VR-IV, VR-V and VR-VIII in AAV9 and AAVPHP.eB engaged  
256        with AAVR PKD2, which differ with AAVR PKD2 interacting VRs in AAV1 and  
257        AAV2 by VR-IV and VR-V. VR-IVs exhibit most conformational variance and  
258        AAV9/PHP.eB. VR-IVs are spatially closer in distance to adjacent AAVR to  
259        facilitate interaction. Despite common morphology among VR-Vs in different  
260        AAV serotypes, E500 and W503 in AAV9 VR-V have potential contacts with  
261        AAVR PKD2. To note, W503 also play a role in galactose binding in AAV9. Our  
262        structural finding further supports the notion that E500-W503 in the AAV9  
263        capsid possess dual function for galactose binding and virus post-attachment  
264        process in previous study<sup>22</sup>.

265        The hybridoma screened PAV9.1 epitope footprint slightly overlaps with that  
266        of AAVR PKD2 on AAV9 (Q588 and Q590), and the immunogenetic peptides  
267        screened by phage display technique exhibit large overlap with AAVR PKD2  
268        footprint on AAV9 VR-III and VR-V. This result indicates one antibody

269 neutralizing mechanism is to occlude AAVR binding and virus cellular trafficking.  
270 However, another commercial antibody CASL9 epitopes reside around AAV9  
271 5-fold axis, and the rest phage display screened immunogenetic peptides also  
272 suggest VP1 unique and VP1/2 common regions are antigenic, hint the  
273 alternative neutralizing mechanism through interfering the AAV cellular  
274 trafficking process other than AAVR binding.

275 AAV9 and its engineered variant AAVPHP.eB support the transduction of  
276 CNS and are able to cross BBB. Their AAVR bound complex structures  
277 revealed that S268 in VR-I underwent a conformational change upon AAVR  
278 binding. AAV9/PHP.eB S268 is also equivalent to S269 in AAVrh.10 which is  
279 reported to be important for BBB penetrating ability. However, despite the VR-I  
280 difference between AAV9 and AAVPHP.eB, little difference in AAVR interaction  
281 was observed including the engineered VR-VIII in AAVPHP.eB. Recent studies  
282 also further elucidate that AAVR is more likely to act as an entry factor  
283 participating in virus intracellular trafficking. In the light of studies on new  
284 acquired LY6A binding ability of AAVPHP.eB, we tried to further explore the  
285 molecular basis of AAVPHP.eB interaction with LY6A. We found that the  
286 engineered VR-VIII in AAVPHP.eB had potential interaction with LY6A.  
287 Suggesting an engineered VR-VIII facilitated alternative receptor recognition  
288 ability for AAVPHP.eB.

289 In summary, the structures of neurotropic clade F AAV9 and its engineered

290 variant AAVPHP.eB in complexed with AAVR deepened the understanding of  
291 AAV receptor engagement and one dominant neutralizing mechanism.  
292 Structural analysis of AAV9-AAVR and AAVPHP.eB-AAVR suggest S268 in VR-  
293 I as determinant residue in BBB penetration. And structure information of  
294 AAVPHP.eB-LY6A also indicate that the enhanced CNS transducing character  
295 is facilitated by novel receptor recognition independent of AAVR. Our structure  
296 information would provide insights for vector engineering in attempts for higher  
297 transduction efficiency and altered tissue tropism.

298

## 299 **Methods**

300

### 301 **Virus production and purification**

302 Triple-plasmid transfection using polyethylenimine reagent (PEIMAX) (No.  
303 24765, Polysciences, USA) was carried out to produce recombinant AAV9 and  
304 AAV-PHP.eB according to a previously reported procedure with modifications<sup>11</sup>,  
305 <sup>14</sup>. Briefly, The plasmids pAAV9-GFP or pAAV-PHP.eB-GFP; pRepCap with  
306 AAV9 or AAV-PHP.eB encoding the Rep and Cap proteins; and pHelper  
307 plasmids were co-transfected into HEK293T cells. Cells were harvested 72 hr  
308 post-transfection, then AAV were purified with iodixanol gradient centrifugation.  
309 AAV genome copy titers were determined by real-time quantitative PCR (qPCR)

310 using primers specific for the GFP gene sequences. The primers used were as  
311 follows: qpcr-GFP-F: TCTTCAAGTCCGCCATGCC; qpcr-GFP-R:  
312 TGTCGCCCTCGAACTTCAC.

313

#### 314 **Purification of AAVR proteins**

315 cDNAs encoding the AAVR PKD1-5 domains with a C-terminal His-tag in a  
316 pET28a vector were transformed into Escherichia coli BL21 (DE3) cells  
317 harboring the recombinant plasmids were cultured in Luria-Bertani (LB)  
318 medium containing 50 µg/ml kanamycin at 37 ° C. Protein expression was  
319 induced by the addition of isopropyl 0.5 mM β-D-thiogalactoside (IPTG) at the  
320 OD600 of 0.6, followed by another 16-hr of cell culture. Protein purification was  
321 performed according to the previous reports<sup>11,14</sup>. Briefly, recombinant protein  
322 was initially purified by nickel affinity chromatography (Qiagen, Holland) and  
323 subsequent size exclusion using Superdex 200 increase (GE Healthcare, USA),  
324 collected the peak around 14 ml. The purified proteins were concentrated to 6  
325 mg/ml for storage at -80 °C until use.

326

#### 327 **Sample preparation and cryo-EM data collection**

328 AAV9 or AAV-PHP.eB particles and purified wt AAVR were mixed at a molar  
329 ratio of 1:120 (AAV:AAVR) at 4 °C for 1hr. An aliquot of 3 µl of each mixture was  
330 loaded onto a glow-discharged, carbon-coated copper grid (GIG, Au 2/1 200



331 mesh; Lantuo, China) bearing an ultrathin layer of carbon. The grid was then  
332 blotted for 4.5 s with a blot force of 0 in 100% relative humidity and plunge-  
333 frozen in liquid ethane using a Vitrobot Mark IV (FEI, USA). Cryo-EM data were  
334 collected with a 200 kV Arctica D683 electron microscope (FEI, USA) and a  
335 Falcon II direct electron detector (FEI, USA). A series of micrographs were  
336 collected as movies (19 frames, 1.2 s) and recorded with -2.2 to -0.5  $\mu\text{m}$   
337 defocus at a calibrated magnification of 110,000 $\times$ , resulting in a pixel size of  
338 0.93 Å per pixel. Statistics for data collection and refinement are summarized  
339 in Supplementary Table 1.

340

#### 341 **Image processing and three-dimensional reconstruction**

342 Similar image processing procedures were employed for all data sets.  
343 Individual frames from each micrograph movie were aligned and averaged  
344 using MotionCor2<sup>23</sup> to produce drift-corrected images. Particles were picked  
345 and selected in RELION 2.1<sup>24</sup>, and the contrast transfer function (CTF)  
346 parameters were estimated using CTFFIND4<sup>25</sup>. Subsequent steps for particle  
347 picking and 2D and 3D classification were performed with RELION 2.1. The  
348 final selected particles (for AAVR complex samples, particles with clear  
349 additional densities above viral particles were selected after 3D classification)  
350 were reconstructed with THUNDER<sup>26</sup>. For all reconstructions, the final  
351 resolution was assessed using the gold-standard FSC criterion (FSC = 0.143)

352 with RELION 2.1.

353

### 354 **Model building and refinement**

355 To solve the structure of AAV9 and AAV-PHP.eB, the X-ray crystal structure  
356 of AAV9 (PDB code: 3ux1)<sup>27</sup> was manually placed and rigid body fitted into the  
357 cryo-EM density map with UCSF Chimera<sup>28</sup>. To solve the AAV9-AAVR and  
358 AAVPHP.eB-AAVR complexes, the PKD2 domain structure from the AAV2-  
359 AAVR structure (PDB: 6IHB) was manually aligned with cryo-EM density  
360 corresponding to the bound receptors. Manual adjustment of amino acids of  
361 AAV9/PHP.eB and PKD2 was performed using Coot<sup>29</sup> in combination with real  
362 space refinement with Phenix. The data validation statistics shown in  
363 **Supplementary Table 1** were reported by MolProbity using the integrated  
364 function within the Phenix statistics module<sup>30</sup>.

365

### 366 **Surface plasmon resonance (SPR)**

367 SPR analyses were carried out using a Biacore T200 (GE Healthcare, USA)  
368 with a flow rate of 30  $\mu$ l/min at 25 °C in PBS buffer. AAV9 or AAVPHP.eB  
369 particles suspended in sodium acetate buffer (pH 4.0) were immobilized on a  
370 CM5 sensor chip by amide coupling. Different concentrations of the  
371 recombinant wildtype AAVR protein flowed over the chip and between each  
372 sample we used Glycine-HCl (10mM Glycine, pH2.0) for chip surface

373 regeneration. The binding affinity was determined by and curves were  
374 generated by BIAEvaluation software (GE Healthcare, USA).

375

376

### 377 **SPR binding competition assay**

378 Binding competition assays were performed by SPR (Biacore S200, GE).  
379 A-B-A injection method were used to unravel if LY6A and AAVR will  
380 simultaneously bind to AAVPHP.eB capsid. The AAVPHP.eB capsid was  
381 immobilized as described above. The A-B-A was used with 90 s injections of  
382 analyte A to ensure saturation or near-saturation was reached prior to injection  
383 of analyte B. Then analyte B is injected with saturated concentration of first  
384 analyte A.

385

### 386 **Data availability**

387 The cryo-EM density maps and the structures were deposited into the  
388 Electron Microscopy Data Bank (EMDB) and Protein Data Bank (PDB) with the  
389 following accession numbers: AAV9 alone, XXXX; AAV9-AAVR, XXXX;  
390 AAVPGP.eB alone, XXXX; AAVPHP.eB-AAVR, XXXX. All other data supporting  
391 the findings of this study are available from the corresponding authors upon  
392 request.

393

394 **Correspondence**

395 Correspondence and requests for materials should be addressed to G.X  
396 and Z.L.

397

398 **Acknowledgments**

399 We thank the Computing and cryo-EM Platforms of Tsinghua University,  
400 Branch of the National Center for Protein Sciences (Beijing) for providing  
401 facilities. We thank Dr. Jianlin Lei and Mr. Tao Liu for their help in data collection.  
402 This work was supported by the National Program on Key Research Project of  
403 China (2020YFA0707500 and 2017YFC0840300), the National Natural  
404 Science Foundation of China (grants no. 31971126 and U20A20135), the China  
405 Postdoctoral Science Foundation (Grant BX2021165) and the Shuimu Tsinghua  
406 Scholar Program of Tsinghua University (Grant 2020SM142).

407 **Author contributions**

408 Z.L. and G.X. conceived the project. Z.L. designed the experiments. R.Z.,  
409 G.X., K.Y. and X.M performed experiments. R.Z., G.X., and Z.L. analyzed the  
410 data. Z.L. and G.X. wrote the manuscript. All authors discussed the experiments,  
411 read and approved the manuscript.

412        **Competing interests**

413        The authors declare no competing interests.

414        **References**

415            1. Melchiorri, D., Pani, L., Gasparini, P., Cossu, G., Ancans, J., Borg, J.J., Drai,  
416 C., Fiedor, P., Flory, E., Hudson, I., et al. (2013). Regulatory evaluation of Glybera in  
417 Europe — two committees, one mission. *Nat Rev Drug Discov* *12*, 719–719.

418            2. Russell, S., Bennett, J., Wellman, J.A., Chung, D.C., Yu, Z.-F., Tillman, A.,  
419 Wittes, J., Pappas, J., Elci, O., McCague, S., et al. (2017). Efficacy and safety of  
420 voretigene neparvovec (AAV2-hRPE65v2) in patients with RPE65 -mediated  
421 inherited retinal dystrophy: a randomised, controlled, open-label, phase 3 trial. *The*  
422 *Lancet* *390*, 849–860.

423            3. Al-Zaidy, S., Pickard, A.S., Kotha, K., Alfano, L.N., Lowes, L., Paul, G.,  
424 Church, K., Lehman, K., Sproule, D.M., Dabbous, O., et al. (2019). Health outcomes  
425 in spinal muscular atrophy type 1 following AVXS-101 gene replacement therapy.  
426 *Pediatr Pulmonol* *54*, 179–185.

427            4. Wu, Z., Asokan, A., and Samulski, R.J. (2006). Adeno-associated Virus  
428 Serotypes: Vector Toolkit for Human Gene Therapy. *Molecular Therapy* *14*, 316–  
429 327.

430            5. Terstappen, G.C., Meyer, A.H., Bell, R.D., and Zhang, W. (2021). Strategies

- 431 for delivering therapeutics across the blood–brain barrier. *Nat Rev Drug Discov*.
- 432 6. Deverman, B.E., Pravdo, P.L., Simpson, B.P., Kumar, S.R., Chan, K.Y.,  
433 Banerjee, A., Wu, W.-L., Yang, B., Huber, N., Pasca, S.P., et al. (2016). Cre-  
434 dependent selection yields AAV variants for widespread gene transfer to the adult  
435 brain. *Nature Biotechnology* *34*, 204–209.
- 436 7. Chan, K.Y., Jang, M.J., Yoo, B.B., Greenbaum, A., Ravi, N., Wu, W.-L.,  
437 Sánchez-Guardado, L., Lois, C., Mazmanian, S.K., Deverman, B.E., et al. (2017).  
438 Engineered AAVs for efficient noninvasive gene delivery to the central and peripheral  
439 nervous systems. *Nature Neuroscience* *20*, 1172–1179.
- 440 8. Ravindra Kumar, S., Miles, T.F., Chen, X., Brown, D., Dobрева, T., Huang,  
441 Q., Ding, X., Luo, Y., Einarsson, P.H., Greenbaum, A., et al. (2020). Multiplexed  
442 Cre-dependent selection yields systemic AAVs for targeting distinct brain cell types.  
443 *Nat Methods* *17*, 541–550.
- 444 9. Pillay, S., Meyer, N.L., Puschnik, A.S., Davulcu, O., Diep, J., Ishikawa, Y.,  
445 Jae, L.T., Wosen, J.E., Nagamine, C.M., Chapman, M.S., et al. (2016). An essential  
446 receptor for adeno-associated virus infection. *Nature* *530*, 108–112.
- 447 10. Pillay, S., Zou, W., Cheng, F., Puschnik, A.S., Meyer, N.L., Ganaie, S.S.,  
448 Deng, X., Wosen, J.E., Davulcu, O., Yan, Z., et al. (2017). Adeno-associated Virus  
449 (AAV) Serotypes Have Distinctive Interactions with Domains of the Cellular AAV  
450 Receptor. *Journal of Virology* *91*, e00391-17, /jvi/91/18/e00391-17.atom.
- 451 11. Zhang, R., Xu, G., Cao, L., Sun, Z., He, Y., Cui, M., Sun, Y., Li, S., Li, H.,

452 Qin, L., et al. (2019). Divergent engagements between adeno-associated viruses with  
453 their cellular receptor AAVR. *Nat Commun* *10*, 3760.

454 12. Huang, Q., Chan, K.Y., Tobey, I.G., Chan, Y.A., Poterba, T., Boutros, C.L.,  
455 Balazs, A.B., Daneman, R., Bloom, J.M., Seed, C., et al. (2019). Delivering genes  
456 across the blood-brain barrier: LY6A, a novel cellular receptor for AAV-PHP.B  
457 capsids. *PLoS ONE* *14*, e0225206.

458 13. Hordeaux, J., Yuan, Y., Clark, P.M., Wang, Q., Martino, R.A., Sims, J.J.,  
459 Bell, P., Raymond, A., Stanford, W.L., and Wilson, J.M. (2019). The GPI-Linked  
460 Protein LY6A Drives AAV-PHP.B Transport across the Blood-Brain Barrier.  
461 *Molecular Therapy* *27*, 912–921.

462 14. Zhang, R., Cao, L., Cui, M., Sun, Z., Hu, M., Zhang, R., Stuart, W., Zhao,  
463 X., Yang, Z., Li, X., et al. (2019). Adeno-associated virus 2 bound to its cellular  
464 receptor AAVR. *Nat Microbiol* *4*, 675–682.

465 15. Albright, B.H., Storey, C.M., Murlidharan, G., Castellanos Rivera, R.M.,  
466 Berry, G.E., Madigan, V.J., and Asokan, A. (2018). Mapping the Structural  
467 Determinants Required for AAVrh.10 Transport across the Blood-Brain Barrier.  
468 *Molecular Therapy* *26*, 510–523.

469 16. Mietzsch, M., Barnes, C., Hull, J.A., Chipman, P., Xie, J., Bhattacharya, N.,  
470 Sousa, D., McKenna, R., Gao, G., and Agbandje-McKenna, M. (2019). Comparative  
471 Analysis of the Capsid Structures of AAVrh.10, AAVrh.39, and AAV8. *J Virol* *94*,  
472 e01769-19, /jvi/94/6/JVI.01769-19.atom.

- 473 17. Shen, S., Bryant, K.D., Brown, S.M., Randell, S.H., and Asokan, A. (2011).  
474 Terminal N-Linked Galactose Is the Primary Receptor for Adeno-associated Virus 9\*.  
475 *Journal of Biological Chemistry* 286, 13532–13540.
- 476 18. Bell, C.L., Gurda, B.L., Van Vliet, K., Agbandje-McKenna, M., and Wilson,  
477 J.M. (2012). Identification of the Galactose Binding Domain of the Adeno-Associated  
478 Virus Serotype 9 Capsid. *Journal of Virology* 86, 7326–7333.
- 479 19. Giles, A.R., Govindasamy, L., Somanathan, S., and Wilson, J.M. (2018).  
480 Mapping an Adeno-associated Virus 9-Specific Neutralizing Epitope To Develop  
481 Next-Generation Gene Delivery Vectors. *J Virol* 92, e01011-18, /jvi/92/20/e01011-  
482 18.atom.
- 483 20. Mietzsch, M., Smith, J.K., Yu, J.C., Banala, V., Emmanuel, S.N., Jose, A.,  
484 Chipman, P., Bhattacharya, N., McKenna, R., and Agbandje-McKenna, M. (2020).  
485 Characterization of AAV-Specific Affinity Ligands: Consequences for Vector  
486 Purification and Development Strategies. *Mol Ther Methods Clin Dev* 19, 362–373.
- 487 21. Chew, W.L., Tabebordbar, M., Cheng, J.K.W., Mali, P., Wu, E.Y., Ng,  
488 A.H.M., Zhu, K., Wagers, A.J., and Church, G.M. (2016). A multifunctional AAV-  
489 CRISPR-Cas9 and its host response. *Nat Methods* 13, 868–874.
- 490 22. Adachi, K., Enoki, T., Kawano, Y., Veraz, M., and Nakai, H. (2014).  
491 Drawing a high-resolution functional map of adeno-associated virus capsid by  
492 massively parallel sequencing. *Nat Commun* 5, 3075.
- 493 23. Zheng, S.Q., Palovcak, E., Armache, J.-P., Verba, K.A., Cheng, Y., and



- 494 Agard, D.A. (2017). MotionCor2: anisotropic correction of beam-induced motion for  
495 improved cryo-electron microscopy. *Nat Methods* *14*, 331–332.
- 496 24. Scheres, S.H.W. (2012). RELION: Implementation of a Bayesian approach  
497 to cryo-EM structure determination. *Journal of Structural Biology* *180*, 519–530.
- 498 25. Rohou, A., and Grigorieff, N. (2015). CTFFIND4: Fast and accurate defocus  
499 estimation from electron micrographs. *Journal of Structural Biology* *192*, 216–221.
- 500 26. Hu, M., Yu, H., Gu, K., Wang, Z., Ruan, H., Wang, K., Ren, S., Li, B., Gan,  
501 L., Xu, S., et al. (2018). A particle-filter framework for robust cryo-EM 3D  
502 reconstruction. *Nat Methods* *15*, 1083–1089.
- 503 27. DiMattia, M.A., Nam, H.-J., Van Vliet, K., Mitchell, M., Bennett, A., Gurda,  
504 B.L., McKenna, R., Olson, N.H., Sinkovits, R.S., Potter, M., et al. (2012). Structural  
505 insight into the Unique Properties of Adeno-Associated Virus Serotype 9. *J Virol* *86*,  
506 6947–6958.
- 507 28. Pettersen, E.F., Goddard, T.D., Huang, C.C., Couch, G.S., Greenblatt, D.M.,  
508 Meng, E.C., and Ferrin, T.E. (2004). UCSF Chimera--A visualization system for  
509 exploratory research and analysis. *J. Comput. Chem.* *25*, 1605–1612.
- 510 29. Emsley, P., Lohkamp, B., Scott, W.G., and Cowtan, K. (2010). Features and  
511 development of Coot. *Acta Crystallogr D Biol Crystallogr* *66*, 486–501.
- 512 30. Afonine, P.V., Klaholz, B.P., Moriarty, N.W., Poon, B.K., Sobolev, O.V.,  
513 Terwilliger, T.C., Adams, P.D., and Urzhumtsev, A. (2018). New tools for the  
514 analysis and validation of cryo-EM maps and atomic models. *Acta Crystallogr D*

515 Struct Biol 74, 814–840.

516

## 517 **Figure Legends**

518 **Figure 1. Cryo-EM reconstruction of AAV9 and AAVPHP.eB particles with**  
519 **or without AAVR binding. (a) AAV9, (b) AAV-PHP.eB, (c) AAV9-AAVR and (d)**  
520 **AAVPHP.eB-AAVR.** The central cross-sections are shown with the icosahedral  
521 two-, three- and fivefold axes. Density maps are radially colored by distance as  
522 shown in the color key and icosahedral 3-fold axis and 5-fold axis are  
523 represented by black triangles and pentagons.

524

525 **Figure 2. receptor interface of AAV9-AAVR and AAVPHP.eB-AAVR**  
526 **complexes. (a)** One AAVR PKD2 (gold) interacts with two AAV9 capsomers  
527 (blue indicating capsomer A, pink indicating capsomer B), and close-up view of  
528 the boxed region (90-degree rotation around Y axis). Only residues have  
529 potential side chain interaction are labeled in the diagram. **(b).** One AAVR PKD2  
530 (gold) interacts with two AAVPHP.eB capsomers (turquoise indicating capsomer  
531 A, purple indicating capsomer B), and close-up view of the boxed region (90-  
532 degree rotation around Y axis). Light blue dashes indicate potential hydrogen  
533 bonds, red dash indicates salt bridge.

534

535 **Figure 3. Density maps of VR-VIII.** (a) AAV9, (b) AAV9-AAVR, (c) AAVPHP.eB  
536 and (d) AAVPHP.eB-AAVR VR-VIII models fitted into density maps. Electron  
537 density maps are shown in grey meshes.

538

539 **Figure 4. Conformational changes of AAV9/PHP.eB capsids upon AAVR**

540 **binding.** Conformational changes of (a)AAV9 and (c) AAVPHP.eB VR-I; VR-  
541 VIII of (b)AAV9 and (d) AAVPHP.eB are shown in ribbon representation. Side  
542 chains are shown in stick representation in same color as in main chain ribbon  
543 diagram.

544

545 **Figure 5. Receptor and antibody binding footprint on AAV9 and**  
546 **AAVPHP.eB capsid.** Projections of the AAV9 and AAVPHP.eB surface. In (a)  
547 AAV9, AAVR PKD2 footprint is filled in black and galactose footprint is out lined  
548 in white. In (a) AAVPHP.eB, AAVR PKD2 footprint is filled in black. On (c) AAV9,  
549 PAV9.1 footprints are filled in grey and phage display screened immunogenetic  
550 peptides are outlined in yellow. Roadmaps was generated by RIVEM, the two  
551 angles ( $\theta$ ,  $\varphi$ ) define a vector and a further location on the icosahedron surface.  
552 As show by the key, roadmaps are colored by distance from the center of the  
553 virus from blue (radius = 90Å) to red (radius = 140Å).

554

555 **Figure 6. Structural superposition of VPs.** Superposition of VP structures  
556 from AAV1, 2, 9, PHP.eB and rh.10. black boxes indicate the enlarged VR-I,  
557 VR-II, VR-IV and VR-VIII.

558

# 1 Figures

## 2 Figure 1

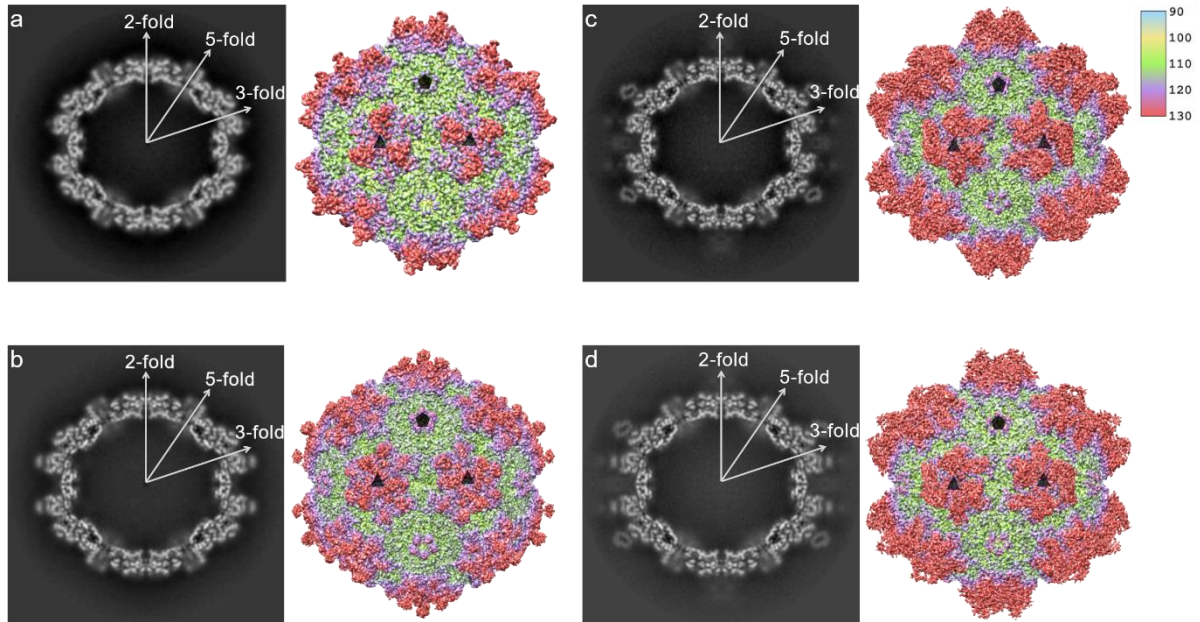

3

4

5 **Figure 2**

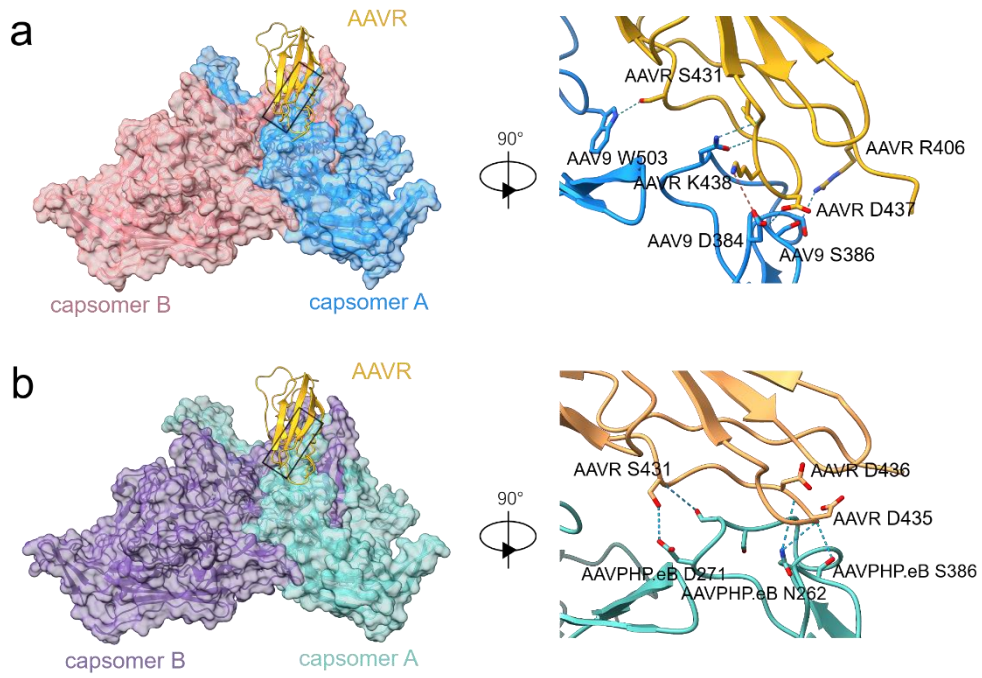

6

7

8 **Figure 3**

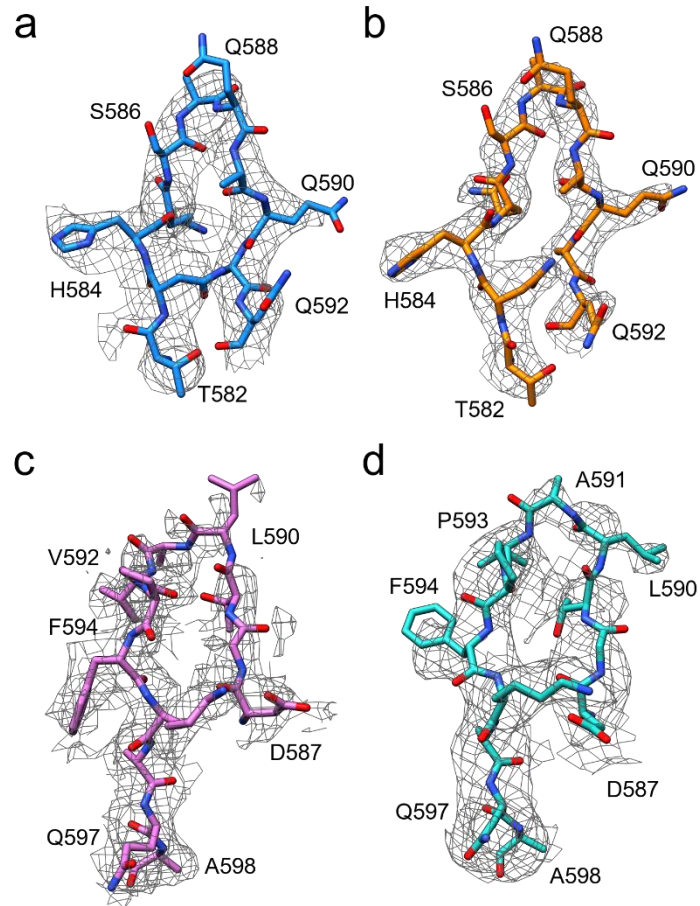

9

10

11 **Figure 4**

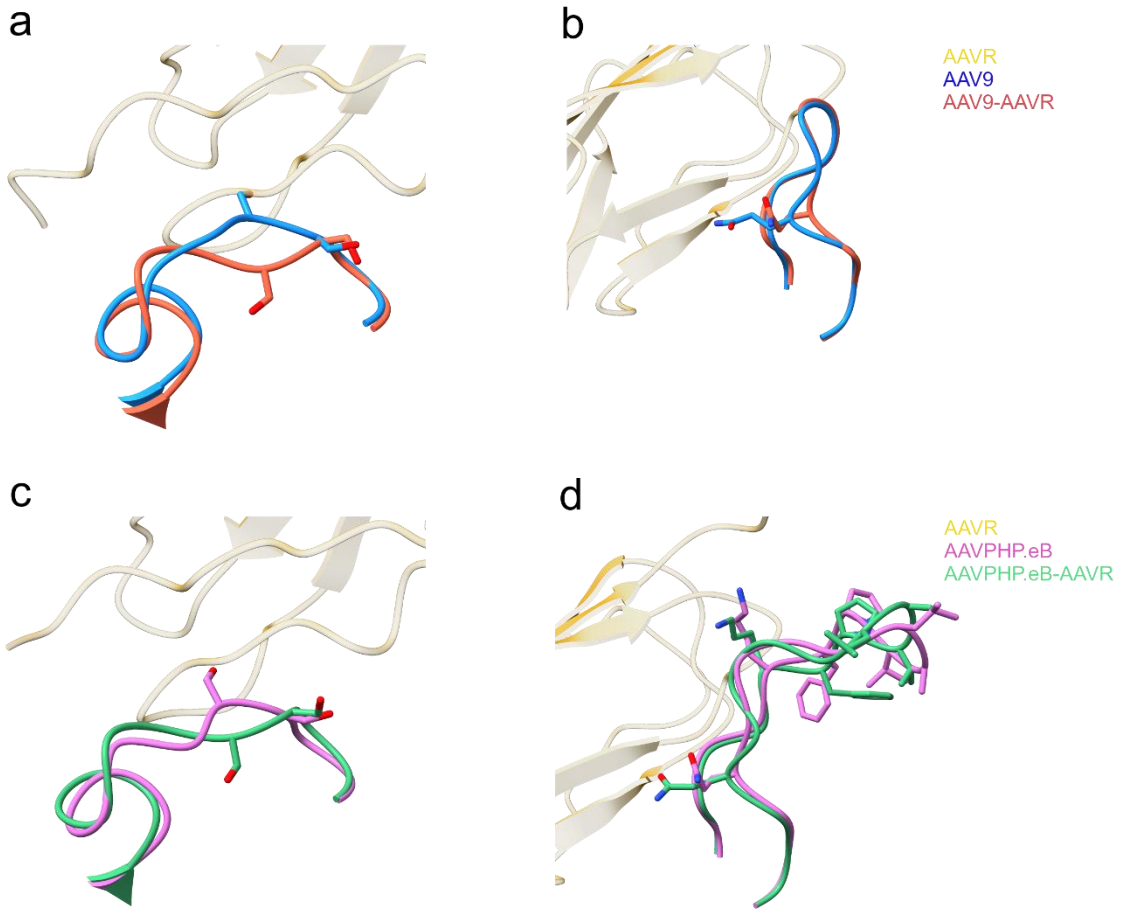

12

13

14 **Figure 5**

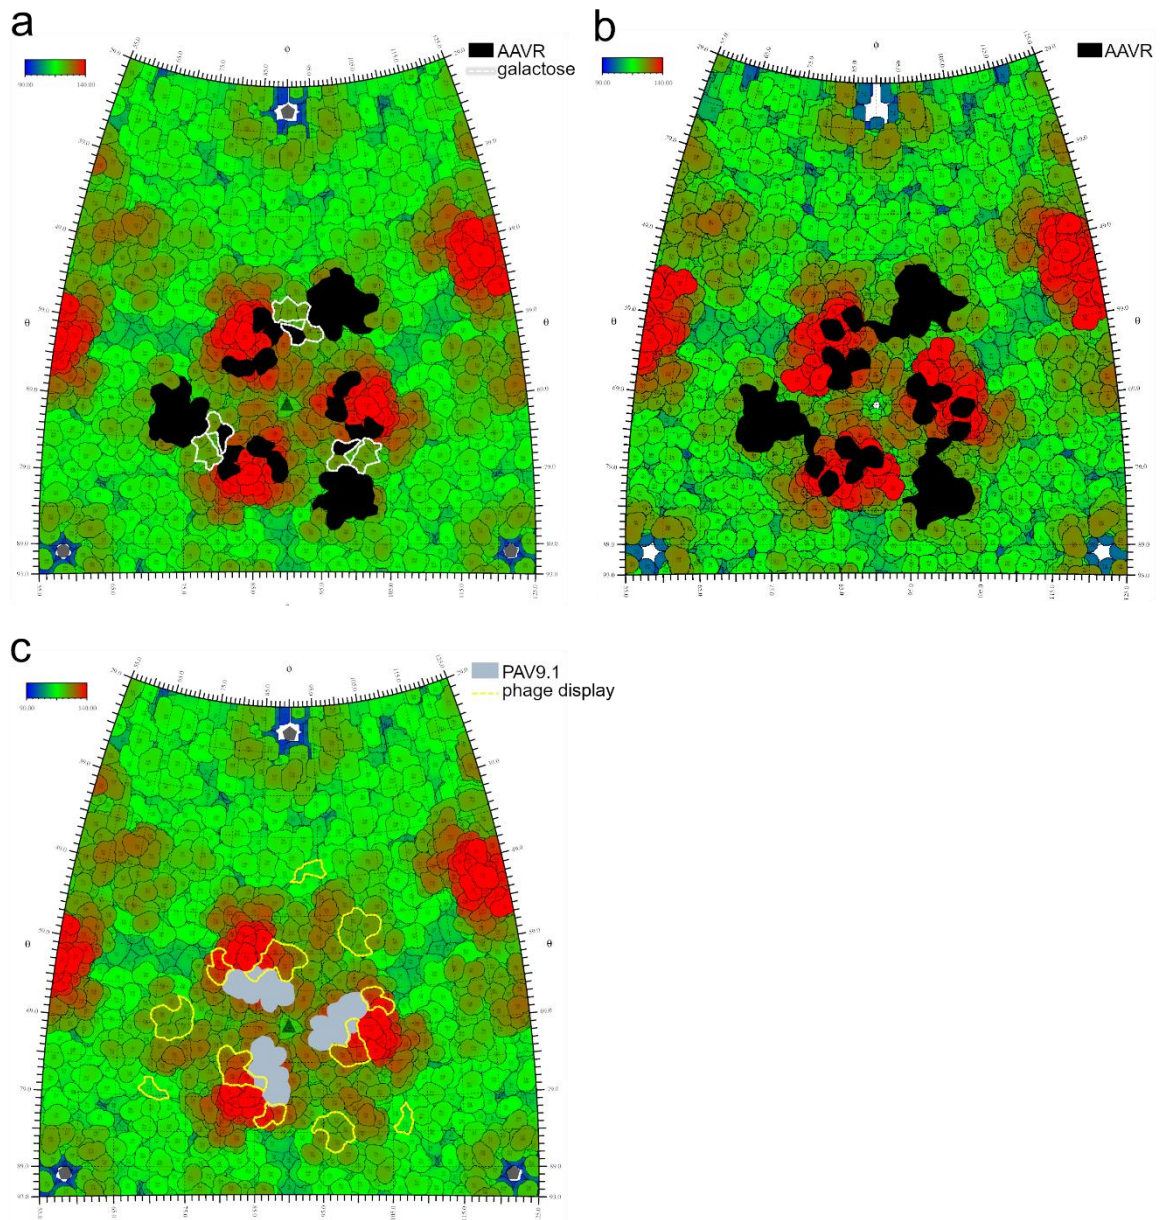

15

16



17 **Figure 6**

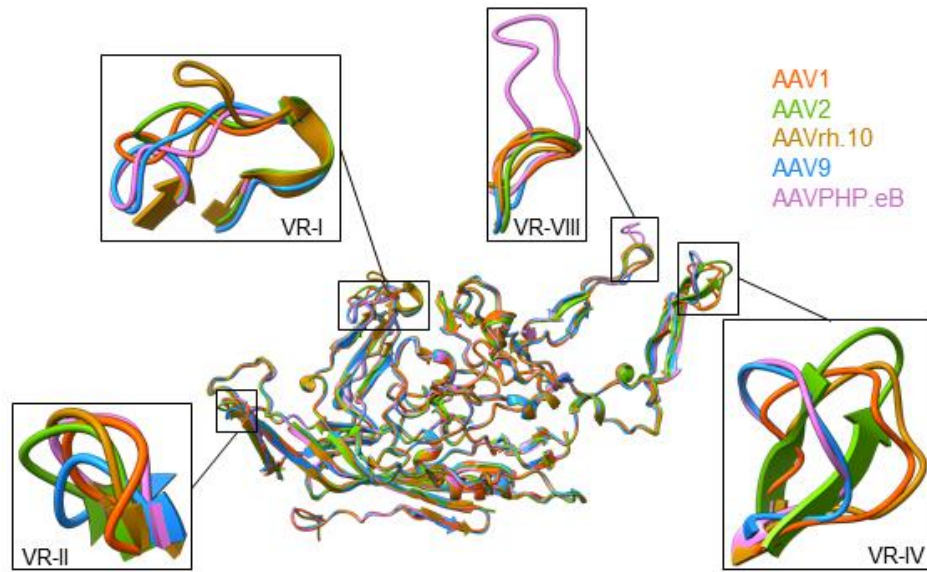

18
